# Supplementary material
Source: ML conference proceedings conference paper supplement (https://openaccess.thecvf.com/content/ICCV2021/html/Ghosh_Synthesis_of_Compositional_ICCV_2021_paper.html)
Supplement: Supplementary file 1 [file Ghosh_Synthesis_of_Compositional_ICCV_2021_supplemental.pdf]

# Synthesis of Compositional Animations from Textual Descriptions - Supplementary materials

Anindita Ghosh<sup>\*1,3</sup>, Noshaba Cheema<sup>1,2,3</sup>, Cennet Oguz<sup>1,3</sup>, Christian Theobalt<sup>2,3</sup>, and Philipp Slusallek<sup>1,3</sup>

<sup>1</sup>German Research Center for Artificial Intelligence (DFKI)

<sup>2</sup>Max-Planck Institute for Informatics

<sup>3</sup>Saarland Informatics Campus

## 1. Results and Discussion

We compare our method with the two baseline methods, JL2P [1] and the method of Lin et al. [2], and also with the four ablations of our method: ‘w/o BERT’, ‘w/o JT’, ‘w/o 2-St’, ‘w/o Lo’, as described in Section 4.4 of our paper. We include more experiments here with two sub-groups of Ablation 3 (‘w/o Lo’).

- **Ablation 3a: Training the hierarchical two-stream model without the adversarial loss (w/o AdLo).** We discard the adversarial loss terms ( $L_D, L_G$ ) described in Section 3.2 when training the model.
- **Ablation 3b: Training the hierarchical two-stream model without the Embedding Similarity Loss (w/o EmLo).** We discard the Embedding similarity loss ( $L_E$ ) introduced in Section 3.2 when training the model.

We show the average positional error (APE) values for individual joints in Table 1. When compared to the ablations of our model, we find that the APE calculated over the mean of all the joints with the global trajectory is marginally better for the ablations compared to our method (best for the ablation ‘w/o 2-St’, showing an improvement of 1.96% over our method). This is because the motions get averaged out in the ablations, bringing the joint positions closer to the mean. However, it also reduces the relevant joint movements. By contrast, our method has the lowest APE for the root joint, implying that the overall motion quality is better. The additional metric of the average variance error (AVE) for evaluating the variability of the motions further shows that the joint movements are reduced in the ablations. Our method has the lowest AVE for the root joint as shown in Table 2. Our method also performs the best in terms of the content encoding error (CEE) and the style encoding error

(SEE) compared to the ablations and the baseline methods as seen in Table 3.

## References

- [1] C. Ahuja and L. Morency. Language2pose: Natural language grounded pose forecasting. In *2019 International Conference on 3D Vision (3DV)*, pages 719–728, 2019.
- [2] Angela S Lin, Lemeng Wu, Rodolfo Corona, Kevin Tai, Qixing Huang, and Raymond J Mooney. Generating animated videos of human activities from natural language descriptions. *Learning*, 2018:2, 2018.

---

\*Corresponding Author: anindita.ghosh@dfki.de.

Table 1: Average Positional Error (APE) in mm for our model compared to JL2P [1], Lin et al. [2], and the ablations of our method described in Section 4.4 of our paper and in Section 1 of the supplementary. Lower values are better. Although the overall APE is lower for our ablations, we find the overall motion quality to be poorer than our final method due to larger errors in the root. Please refer to Section 5.1 of our paper for details.

|                     | JL2P  | Lin et al. | w/o BERT    | w/o JT       | w/o 2-St     | w/o Lo       | w/o AdLo    | w/o EmLo | Ours        |
|---------------------|-------|------------|-------------|--------------|--------------|--------------|-------------|----------|-------------|
| Trajectory          | 4.12  | 4.52       | 1.21        | 1.27         | 1.22         | 1.23         | <b>1.16</b> | 1.23     | 1.22        |
| Root                | 7.28  | 7.78       | 3.23        | 3.50         | 3.22         | 3.23         | <b>3.21</b> | 3.24     | <b>3.21</b> |
| Torso               | 13.18 | 14.93      | 5.84        | <b>5.71</b>  | <b>5.71</b>  | 5.91         | 5.8         | 5.85     | 5.90        |
| Pelvis              | 14.92 | 16.10      | <b>6.49</b> | 6.54         | 6.52         | 6.67         | 6.51        | 6.55     | 6.60        |
| Neck                | 33.01 | 36.03      | 14.88       | <b>14.50</b> | 14.69        | 15.04        | 14.80       | 14.90    | 15.01       |
| Left Arm            | 37.37 | 41.71      | 16.54       | 16.79        | <b>16.09</b> | 16.79        | 16.91       | 16.89    | 16.94       |
| Right Arm           | 37.91 | 42.33      | 16.41       | 16.56        | <b>15.81</b> | 16.25        | 16.28       | 16.15    | 16.40       |
| Left Hip            | 13.50 | 14.33      | <b>6.02</b> | 6.12         | 6.14         | 6.18         | 6.04        | 6.07     | 6.21        |
| Right Hip           | 13.39 | 14.05      | <b>6.00</b> | 6.15         | 6.15         | 6.20         | 6.06        | 6.12     | 6.22        |
| Left Foot           | 38.38 | 38.84      | 16.78       | 16.63        | 16.84        | <b>16.25</b> | 16.49       | 16.70    | 16.97       |
| Right Foot          | 39.66 | 40.31      | 17.12       | 17.15        | 17.24        | <b>16.78</b> | 17.01       | 17.15    | 17.22       |
| Mean w/o trajectory | 24.86 | 26.64      | 10.93       | 10.96        | <b>10.84</b> | 10.93        | 10.91       | 10.97    | 11.07       |
| Mean                | 22.97 | 24.63      | 10.04       | 10.08        | <b>9.97</b>  | 10.05        | 10.02       | 10.08    | 10.17       |

Table 2: Average Variance Error (AVE) for our model compared to JL2P [1], Lin et al. [2], and the ablations of our method described in Section 4.4 of our paper and in Section 1 of the supplementary. Lower values are better. Our method has the lowest AVE for the root joint as well as the mean of all the joints with and without the global trajectory.

|                     | JL2P  | Lin et al. | w/o BERT | w/o JT | w/o 2-St | w/o Lo       | w/o AdLo     | w/o EmLo     | Ours         |
|---------------------|-------|------------|----------|--------|----------|--------------|--------------|--------------|--------------|
| Trajectory          | 18.55 | 19.00      | 10.87    | 10.52  | 11.20    | 9.75         | <b>8.91</b>  | 9.59         | 10.29        |
| Root                | 4.70  | 5.46       | 2.45     | 2.42   | 2.32     | 2.30         | <b>2.19</b>  | 2.22         | <b>2.19</b>  |
| Torso               | 21.44 | 22.61      | 12.65    | 12.20  | 13.22    | 11.85        | <b>10.38</b> | 11.41        | 11.87        |
| Pelvis              | 23.79 | 24.51      | 13.66    | 13.25  | 13.99    | 12.73        | 12.59        | 12.59        | <b>12.58</b> |
| Neck                | 45.05 | 36.03      | 26.24    | 25.26  | 27.37    | 24.78        | <b>24.08</b> | 23.81        | 24.65        |
| Left Arm            | 32.66 | 41.71      | 16.59    | 16.42  | 16.86    | 15.66        | 15.00        | <b>14.67</b> | 15.20        |
| Right Arm           | 29.15 | 42.34      | 15.18    | 14.54  | 15.05    | 14.31        | 13.98        | 13.95        | <b>13.95</b> |
| Left Hip            | 27.79 | 28.73      | 16.01    | 15.45  | 15.82    | 14.35        | 14.46        | <b>14.04</b> | 14.71        |
| Right Hip           | 26.73 | 27.05      | 14.46    | 14.13  | 14.92    | <b>13.31</b> | 13.41        | 13.40        | 13.40        |
| Left Foot           | 48.34 | 38.84      | 24.63    | 24.03  | 23.67    | 22.27        | 21.65        | 21.61        | <b>21.57</b> |
| Right Foot          | 47.23 | 40.31      | 23.04    | 23.10  | 22.80    | 20.72        | <b>19.43</b> | 20.14        | 20.87        |
| Mean w/o Trajectory | 30.69 | 30.75      | 16.49    | 16.08  | 16.60    | 15.22        | <b>14.71</b> | 14.78        | 15.09        |
| Mean                | 29.58 | 29.69      | 15.98    | 15.57  | 16.11    | 14.73        | <b>14.18</b> | 14.31        | 14.66        |

Table 3: Content Encoding Error (CEE) and Style Encoding Error (SEE) for our model compared to JL2P [1], Lin et al. [2], and the ablations of our method described in Section 4.4 of our paper and in Section 1 of the supplementary. Lower values are better. Our method has the lowest CEE and SEE.

| Method | JL2P | Lin et al. | w/o BERT | w/o JT | w/o 2-St | w/o Lo | w/o AdLo | w/o EmLo | Ours        |
|--------|------|------------|----------|--------|----------|--------|----------|----------|-------------|
| CEE    | 1.06 | 1.92       | 1.10     | 0.99   | 0.67     | 1.04   | 0.54     | 1.03     | <b>0.53</b> |
| SEE    | 0.38 | 1.13       | 0.80     | 0.76   | 0.46     | 0.77   | 0.20     | 0.72     | <b>0.19</b> |
